# Supplementary material for: Biogenic ZnO Nanoparticles Synthesized Using a Novel Plant Extract: Application to Enhance Physiological and Biochemical Traits in Maize
Source: MDPI journal article supplement (doi:10.3390/nano11051270), 2021-05-12
Supplement: s1 [file s1]

## Supplementary material for Article

# Biogenic ZnO Nanoparticles Synthesized Using a Novel Plant Extract: Application to Enhance Physiological and Biochemical Traits in Maize

Daniele Del Buono <sup>1</sup>, Alessandro Di Michele <sup>2</sup>, Ferdinando Costantino <sup>3,\*</sup>, Marco Trevisan <sup>4</sup> and Luigi Lucini <sup>4</sup>

<sup>1</sup> Dipartimento di Scienze Agrarie, Alimentari e Ambientali, University of Perugia, Borgo XX Giugno, 06121 Perugia, Italy; daniele.delbuono@unipg.it

<sup>2</sup> Department of Physics and Geology, University of Perugia, Via Elce di Sotto, 06123 Perugia, Italy; alessandro.dimichele@collaboratori.unipg.it

<sup>3</sup> Dipartimento di Chimica, Biologia e Biotecnologia, University of Perugia, Via Elce di Sotto 8, 06123 Perugia, Italy

<sup>4</sup> Department for Sustainable Food Process, Università Cattolica del Sacro Cuore, 29122 Piacenza, Italy; marco.trevisan@unicatt.it (M.T.); luigi.lucini@unicatt.it (L.L.)

\* Correspondence: ferdinando.costantino@unipg.it; Tel.: +39-075-5855563

**Table S1.** Untargeted metabolomics of duckweed

| Compound                                                                  | class      | subclass     | repl. 1 | repl. 2 | repl. 3 | Retention Time | CompositeSpectrum                                                                                         |
|---------------------------------------------------------------------------|------------|--------------|---------|---------|---------|----------------|-----------------------------------------------------------------------------------------------------------|
| Delphinidin 3-O-glucosyl-glucoside                                        | Flavonoids | Anthocyanins | 1348089 | 1300396 | 1287902 | 25.26          | (612.1758, 7721.223)(613.17535, 1612.9067)                                                                |
| Cyanidin 3-O-glucosyl-rutinoside                                          | Flavonoids | Anthocyanins | 544990  | 523598  | 518408  | 26.69          | (758.21356, 13293.754)(759.21405, 8281.646)(760.21234, 6216.8013)(761.2116, 1756.4116)                    |
| Delphinidin 3,5-O-diglucoside                                             | Flavonoids | Anthocyanins | 1348089 | 1300396 | 1287902 | 25.26          | (612.1758, 7721.223)(613.17535, 1612.9067)                                                                |
| Cyanidin 3-O-sophoroside                                                  | Flavonoids | Anthocyanins | 129509  | 112303  | 114434  | 15.32          | (611.1779, 14230.013)(595.1574, 8364.227)(596.16034, 901.25665)(612.17596, 9758.246)(613.1755, 1982.7767) |
| Malvidin 3-O-(6''-acetyl-galactoside)/Malvidin 3-O-(6''-acetyl-glucoside) | Flavonoids | Anthocyanins | 187221  | 181944  | 174395  | 24.46          | (536.15845, 7875.565)(537.1589, 2269.1335)(538.15717, 315.0625)                                           |
| Delphinidin 3-O-rutinoside                                                | Flavonoids | Anthocyanins | 129509  | 112303  | 114434  | 15.32          | (611.1779, 14230.013)(595.1574, 8364.227)(596.16034,                                                      |

|                                                                  |            |                  |         |         |         |       |                                                                                                                    |
|------------------------------------------------------------------|------------|------------------|---------|---------|---------|-------|--------------------------------------------------------------------------------------------------------------------|
|                                                                  |            |                  |         |         |         |       | 901.25665)(612.17596,<br>9758.246)(613.1755, 1982.7767)                                                            |
| Pigment A                                                        | Flavonoids | Anthocyanins     | 1348089 | 1300396 | 1287902 | 25.26 | (610.1774, 23516.78)(611.1778,<br>11883.142)(612.1758,<br>7721.223)(613.17535, 1612.9067)                          |
| Cyanidin 3,5-O-diglucoside                                       | Flavonoids | Anthocyanins     | 129509  | 112303  | 114434  | 15.32 | (611.1779, 14230.013)(595.1574,<br>8364.227)(596.16034,<br>901.25665)(612.17596,<br>9758.246)(613.1755, 1982.7767) |
| Peonidin 3-O-rutinoside/Peonidin 3-O-(6''-p-coumaroyl-glucoside) | Flavonoids | Anthocyanins     | 1348089 | 1300396 | 1287902 | 25.26 | (610.1774, 23516.78)(611.1778,<br>11883.142)(612.1758,<br>7721.223)(613.17535, 1612.9067)                          |
| Cyanidin 3-O-(6''-p-coumaroyl-glucoside)                         | Flavonoids | Anthocyanins     | 146252  | 122986  | 125393  | 5.38  | (595.1574, 8364.227)(596.16034,<br>901.25665)                                                                      |
| Delphinidin 3-O-(6''-p-coumaroyl-glucoside)                      | Flavonoids | Anthocyanins     | 129509  | 112303  | 114434  | 5.38  | (595.1574, 8364.227)(596.16034,<br>901.25665)                                                                      |
| Delphinidin 3-O-feruloyl-glucoside                               | Flavonoids | Anthocyanins     | 135157  | 120366  | 126427  | 5.61  | (647.1483, 427.02)(625.16754,<br>9068.923)(626.17053, 1017.37665)                                                  |
| Petunidin 3-O-rutinoside/Pelargonidin 3-O-sophoroside            | Flavonoids | Anthocyanins     | 146252  | 122986  | 125393  | 5.38  | (595.1574, 8364.227)(596.16034,<br>901.25665)                                                                      |
| Cyanidin 3-O-(6''-caffeoyl-glucoside)                            | Flavonoids | Anthocyanins     | 129509  | 112303  | 114434  | 5.38  | (595.1574, 8364.227)(596.16034,<br>901.25665)                                                                      |
| Cyanidin 3-O-rutinoside                                          | Flavonoids | Anthocyanins     | 146252  | 122986  | 125393  | 5.38  | (595.1574, 8364.227)(596.16034,<br>901.25665)                                                                      |
| Petunidin 3,5-O-diglucoside                                      | Flavonoids | Anthocyanins     | 135157  | 120366  | 126427  | 5.61  | (625.1673, 9825.37)(626.1703,<br>953.67)(647.1483, 427.02)                                                         |
| Petunidin 3-O-(6''-p-coumaroyl-glucoside)                        | Flavonoids | Anthocyanins     | 142099  | 138302  | 138286  | 5.61  | (625.16754, 9068.923)(626.17053,<br>1017.37665)                                                                    |
| (+)-Catechin                                                     | Flavonoids | Flavanols        | 208873  | 195930  | 204294  | 7.11  | (291.09396, 7694.814)(313.07535,<br>5652.69)                                                                       |
| (+)-Gallocatechin                                                | Flavonoids | Flavanols        | 202796  | 197678  | 187574  | 2.16  | (306.07642, 9524.97)(307.07968,<br>993.25)(290.08243, 1844.1068)                                                   |
| Phloretin 2'-O-xylosyl-glucoside                                 | Flavonoids | Dihydrochalcones | 131587  | 137999  | 159235  | 7.46  | (573.18695, 25149.297)(574.18945,<br>5575.607)                                                                     |

|                                                                                                                           |            |            |         |         |         |       |                                                                                      |
|---------------------------------------------------------------------------------------------------------------------------|------------|------------|---------|---------|---------|-------|--------------------------------------------------------------------------------------|
| Neohesperidin/Hesperidin                                                                                                  | Flavonoids | Flavanones | 1623560 | 1570777 | 1542372 | 25.26 | (610.1774, 24965.875)(611.1778, 12953.5205)                                          |
| Neodiosmin/Diosmin                                                                                                        | Flavonoids | Flavones   | 986179  | 945245  | 933800  | 25.26 | (610.1774, 20799.129)(611.1778, 9922.528)(612.1758, 6447.187)(613.17535, 1347.225)   |
| Nepetin                                                                                                                   | Flavonoids | Flavones   | 118697  | 116413  | 116717  | 1.39  | (299.043, 9927.094)(300.04398, 3061.5266)                                            |
| Tetramethylscutellarein                                                                                                   | Flavonoids | Flavones   | 201826  | 195493  | 193794  | 5.95  | (343.12228, 14359.937)(344.12476, 1315.7167)                                         |
| Chrysoeriol 7-O-apiosyl-glucoside/Apigenin 6,8-di-C-glucoside/Luteolin 7-O-rutinoside                                     | Flavonoids | Flavones   | 146252  | 122986  | 125393  | 5.38  | (595.1574, 8364.227)(596.16034, 901.25665)                                           |
| Kaempferol 3,7-O-diglucoside/Quercetin 3-O-galactoside 7-O-rhamnoside/Kaempferol 3-O-sophoroside/Quercetin 3-O-rutinoside | Flavonoids | Flavonols  | 1623560 | 1570777 | 1542372 | 25.26 | (612.1758, 8434.604)(613.17535, 1762.6201)(611.1778, 12953.5205)                     |
| Kaempferol 3-O-glucosyl-rhamnosyl-glucoside                                                                               | Flavonoids | Flavonols  | 379289  | 367652  | 362814  | 26.69 | (758.21356, 12976.849)(759.21405, 7940.65)(760.21234, 5961.029)(761.2116, 1684.1034) |
| Quercetin 3-O-rhamnosyl-galactoside                                                                                       | Flavonoids | Flavonols  | 1623560 | 1570777 | 1542372 | 25.26 | (612.1758, 8434.604)(613.17535, 1762.6201)(611.1778, 12953.5205)                     |
| Kaempferol 3-O-glucosyl-rhamnosyl-galactoside                                                                             | Flavonoids | Flavonols  | 379289  | 367652  | 362814  | 26.69 | (758.21356, 12976.849)(759.21405, 7940.65)(760.21234, 5961.029)(761.2116, 1684.1034) |
| Quercetin 3-O-rhamnosyl-rhamnosyl-glucoside                                                                               | Flavonoids | Flavonols  | 379289  | 367652  | 362814  | 26.69 | (758.21356, 12976.849)(759.21405, 7940.65)(760.21234, 5961.029)(761.2116, 1684.1034) |
| 6,8-Dihydroxykaempferol                                                                                                   | Flavonoids | Flavonols  | 2790476 | 2724843 | 2726585 | 5.98  | (341.01947, 616.77)(319.03937, 149745.45)(320.0419, 16677.469)(321.04034, 508.075)   |
| Isorhamnetin                                                                                                              | Flavonoids | Flavonols  | 118697  | 116413  | 116717  | 1.39  | (299.043, 9927.094)(300.04398, 3061.5266)                                            |
| Kaempferol 3-O-rutinoside                                                                                                 | Flavonoids | Flavonols  | 146252  | 122986  | 125393  | 5.38  | (595.1574, 8364.227)(596.16034, 901.25665)                                           |

|                                                     |                |                           |         |         |         |       |                                                                                      |
|-----------------------------------------------------|----------------|---------------------------|---------|---------|---------|-------|--------------------------------------------------------------------------------------|
| Myricetin                                           | Flavonoids     | Flavonols                 | 2790476 | 2724843 | 2726585 | 5.98  | (341.01947, 616.77)(319.03937, 149745.45)(320.0419, 16677.469)(321.04034, 508.075)   |
| Quercetin 3-O-xylosyl-glucuronide                   | Flavonoids     | Flavonols                 | 746335  | 732066  | 737320  | 5.98  | (615.08716, 42211.4)(616.08905, 9811.126)(617.0774, 2988.01)                         |
| Rhamnetin                                           | Flavonoids     | Flavonols                 | 118697  | 116413  | 116717  | 1.39  | (299.043, 9927.094)(300.04398, 3061.5266)                                            |
| Isorhamnetin 3-O-glucoside 7-O-rhamnoside           | Flavonoids     | Flavonols                 | 147729  | 138302  | 138286  | 5.61  | (647.1483, 427.02)(625.1673, 9825.37)(626.1703, 953.67)                              |
| Isoferulic acid/Ferulic acid                        | Phenolic acids | Hydroxycinnamic acids     | 2145806 | 2098528 | 2089305 | 7.36  | (177.05347, 83174.09)(178.05617, 6248.8696)(201.04121, 10838.944)(203.0504, 2057.28) |
| p-Coumaroyl malic acid                              | Phenolic acids | Hydroxycinnamic acids     | 119268  | 115476  | 115010  | 6.95  | (281.06625, 1359.5367)(303.0432, 5027.4634)                                          |
| Caffeic acid                                        | Phenolic acids | Hydroxycinnamic acids     | 5623987 | 5467105 | 5419568 | 5.98  | (185.06374, 8213.83)(163.03793, 220429.38)(164.0407, 16307.753)                      |
| o-Coumaric acid/p-Coumaric acid/m-Coumaric acid     | Phenolic acids | Hydroxycinnamic acids     | 280101  | 302421  | 286450  | 2.13  | (165.05305, 16083.914)(168.06136, 3322.867)(147.0419, 2958.5967)                     |
| Cinnamic acid                                       | Phenolic acids | Hydroxycinnamic acids     | 189788  | 188061  | 194672  | 2.73  | (149.0581, 6252.15)(131.04767, 5045.14)                                              |
| p-Coumaroyl tartaric acid                           | Phenolic acids | Hydroxycinnamic acids     | 2774366 | 2724843 | 2721429 | 5.98  | (319.0394, 149131.64)(320.0419, 16572.127)(321.04028, 511.19333)                     |
| Sinapine                                            | Phenolic acids | Hydroxycinnamic acids     | 807651  | 800273  | 778141  | 3.41  | (333.1481, 40457.066)(334.15088, 3920.0203)                                          |
| Homoveratric acid                                   | Phenolic acids | Hydroxyphenylacetic acids | 153636  | 148461  | 154157  | 7.36  | (204.06067, 2738.8633)(205.06624, 5933.5034)                                         |
| 4-Hydroxyphenylacetic acid                          | Phenolic acids | Hydroxyphenylacetic acids | 189723  | 185864  | 187687  | 2.16  | (137.04506, 3735.11)(153.05693, 8292.696)                                            |
| Homovanillic acid/Dihydrocaffeic acid               | Phenolic acids | Hydroxyphenylacetic acids | 237124  | 253769  | 243069  | 2.13  | (185.06384, 9106.32)(165.05305, 14771.997)                                           |
| Anhydro-secoisolariciresinol                        | Lignans        | Lignans                   | 165301  | 164208  | 167079  | 6.162 | (367.15463, 9237.667)(349.14453, 2421.6833)                                          |
| Resveratrol 3-O-glucoside/Resveratrol 5-O-glucoside | Stilbenes      | Stilbenes                 | 670746  | 662292  | 649620  | 6.162 | (390.14014, 32490.709)(391.13205, 5498.9766)                                         |

|                                 |                   |                        |         |         |         |           |                                                                                                                                                                                                          |
|---------------------------------|-------------------|------------------------|---------|---------|---------|-----------|----------------------------------------------------------------------------------------------------------------------------------------------------------------------------------------------------------|
| Piceatannol 3-O-glucoside       | Stilbenes         | Stilbenes              | 4466405 | 4474697 | 4406861 | 6.162     | (391.13205, 5498.9766)(411.11725, 3089.9)                                                                                                                                                                |
| p-HPEA-AC                       | Other polyphenols | Tyrosols               | 1905260 | 325222  | 2430921 | 1.8623334 | (182.07956, 11061.445)(183.0824, 799.325)(164.07236, 9954.865)(165.0757, 515.06)(166.0853, 45848.22)(167.0879, 3519.1602)(206.0789, 61.92)(186.73332, 15367.487)(187.46553, 11754.587)(188.0674, 886.59) |
| 3,4-DHPEA-EDA                   | Other polyphenols | Tyrosols               | 201826  | 195493  | 198987  | 5.945     | (343.12228, 14000.55)(344.12476, 1283.2034)                                                                                                                                                              |
| 3,4-DHPEA-AC                    | Other polyphenols | Tyrosols               | 153636  | 148461  | 154157  | 7.3629994 | (204.06067, 2738.8633)(205.06624, 5933.5034)                                                                                                                                                             |
| Hydroxytyrosol                  | Other polyphenols | Tyrosols               | 2124202 | 2087590 | 2084042 | 7.3629994 | (177.05347, 83174.09)(178.05617, 6248.8696)                                                                                                                                                              |
| Bisdemethoxycurcumin            | Other polyphenols | Curcuminoids           | 208873  | 195930  | 204294  | 7.1129994 | (291.09396, 7694.814)(313.07535, 5652.69)                                                                                                                                                                |
| p-Anisaldehyde                  | Other polyphenols | Hydroxybenzaldehydes   | 260664  | 260261  | 253899  | 2.125     | (119.047264, 2669.4768)(123.05404, 40229.035)(137.0617, 7518.096)                                                                                                                                        |
| Vanillin                        | Other polyphenols | Hydroxybenzaldehydes   | 189723  | 185864  | 187687  | 2.1590002 | (137.04506, 3735.11)(153.05693, 8292.696)                                                                                                                                                                |
| Syringaldehyde                  | Other polyphenols | Hydroxybenzaldehydes   | 237124  | 253769  | 243069  | 2.125     | (185.06384, 9106.32)(165.05305, 14771.997)                                                                                                                                                               |
| Ferulaldehyde                   | Other polyphenols | Hydroxycinnamaldehydes | 153636  | 148461  | 154157  | 7.3629994 | (204.06067, 2738.8633)(205.06624, 5933.5034)                                                                                                                                                             |
| 4-Hydroxycoumarin/Umbelliferone | Other polyphenols | Hydroxycoumarins       | 5654984 | 5498468 | 5457679 | 3.6995    | (163.03793, 220429.38)(164.0407, 16307.753)(145.02684, 1476.3766)(168.04893, 5177.217)(167.01064, 5883.1704)(168.0107, 874.29663)                                                                        |
| Mellein                         | Other polyphenols | Hydroxycoumarins       | 153636  | 148461  | 154157  | 7.3629994 | (204.06067, 2738.8633)(205.06624, 5933.5034)                                                                                                                                                             |

|                         |                   |                     |         |         |         |           |                                                                   |
|-------------------------|-------------------|---------------------|---------|---------|---------|-----------|-------------------------------------------------------------------|
| Guaiacol                | Other polyphenols | Methoxyphenols      | 122458  | 120462  | 121144  | 2.7180002 | (107.0439, 12339.33)(152.0552, 4312.705)                          |
| Thymol                  | Other polyphenols | Phenolic terpenes   | 347013  | 282785  | 317232  | 2.076     | (133.104, 17294.5)(177.1002, 2758.5234)                           |
| Carnosic acid           | Other polyphenols | Phenolic terpenes   | 2716898 | 2592367 | 2646366 | 13.584    | (333.19986, 45602.594)(334.20267, 6650.31)(335.2138, 1066.27)     |
| Carnosol                | Other polyphenols | Phenolic terpenes   | 323351  | 320697  | 315232  | 15.352    | (331.1827, 12112.144)(315.18918, 30034.904)(316.19238, 3266.6335) |
| Rosmadial               | Other polyphenols | Phenolic terpenes   | 165301  | 164208  | 167079  | 6.162     | (367.15463, 9237.667)(349.14453, 2421.6833)                       |
| Carvacrol               | Other polyphenols | Phenolic terpenes   | 347013  | 282785  | 317232  | 2.076     | (133.104, 17294.5)(177.1002, 2758.5234)                           |
| 4-Vinylsyringol         | Other polyphenols | Alkylmethoxyphenols | 231540  | 220560  | 218686  | 2.643     | (242.09727, 4951.7397)(265.07642, 6452.754)                       |
| 5-Nonadecenylresorcinol | Other polyphenols | Alkylphenols        | 1383718 | 1365768 | 1379982 | 8.044999  | (397.29868, 68142.18)(398.30045, 1702.64)                         |
| 3-Methylcatechol        | Other polyphenols | Alkylphenols        | 122458  | 120462  | 123255  | 2.7180002 | (107.0439, 12339.33)(152.0552, 4312.705)                          |
| 4-Vinylphenol           | Other polyphenols | Alkylphenols        | 671772  | 656575  | 660965  | 2.726     | (103.0534, 30908.695)(104.056656, 248.07)                         |
